# Supplementary material for: Two-Stage Primary Arthroplasty of Native Hips and Knees That Had Previously Failed Treatment for Septic Arthritis: A Single-Center Experience
Source: PubMed Central journal article supplement — Arthroplast Today. 2020 Jun 23;6(3):431–6. doi: 10.1016/j.artd.2020.05.012 (PMC7316870; doi:10.1016/j.artd.2020.05.012), 2020-06-23
Supplement: mmc3.pdf [file mmc3.pdf]

# INDIVIDUAL CONFLICT OF INTEREST STATEMENT

## *American Association of Hip and Knee Surgeons*

(Adopted from the American Academy of Orthopaedic Surgeons disclosure statement)

The following form **must be filled out completely and submitted by each author (example, 6 authors, 6 forms).**

**All items require a response. If there is no relevant disclosure for a given item, enter "None."**

### Manuscript Title: Two stage Primary Total Joint Arthroplasty

1. Royalties from a company or supplier (The following conflicts were disclosed)

None

2. Speakers bureau/paid presentations for a company or supplier (The following conflicts were disclosed)

None

- 3A. Paid employee for a company or supplier (The following conflicts were disclosed)

None

- 3B. Paid consultant for a company or supplier (The following conflicts were disclosed)

Link, DSO, Exactech, Medacta

- 3C. Unpaid consultants for a company or supplier (The following conflicts were disclosed)

None

4. Stock or stock options in a company or supplier (The following conflicts were disclosed)

None

5. Research support from a company or supplier as a Principal Investigator (The following conflicts were disclosed)

None

6. Other financial or material support from a company or supplier (The following conflicts were disclosed)

None

7. Royalties, financial or material support from publishers (The following conflicts were disclosed)

Spine Inc., Human kinetics

8. Medical/Orthopaedic publications editorial/governing board (The following conflicts were disclosed)

Arthroplasty Today, JAA, Orthopedics

9. Board member/committee appointments for a society (The following conflicts were disclosed)

AAAKS Patient Education Committee, AAKS Research Com, AAOS Hip/Knee  
eval committee

Each author must sign AND print or type his/her name, date and submit a separate form

In addition, one BLINDED Conflict of Interest form (no author names used) should be submitted per manuscript with all author disclosures.

Author Name (Print or Type) *Buettner* Author Signature   
Date *10/2/2015*
